# Supplementary material for: Combinatorial Pharmacophore Modeling of Multidrug and Toxin Extrusion Transporter 1 Inhibitors: a Theoretical Perspective for Understanding Multiple Inhibitory Mechanisms
Source: PubMed Central journal article supplement (PMC4556958; doi:10.1038/srep13684), 2015-09-02
Supplement: srep13684-s1.pdf [file srep13684-s1.pdf]

# Combinatorial Pharmacophore Modeling of Multidrug and Toxin Extrusion Transporter 1 Inhibitors: a Theoretical Perspective for Understanding Multiple Inhibitory Mechanisms

*Yuan Xu<sup>†</sup>, Xian Liu<sup>†</sup>, Yulan Wang<sup>†</sup>, Nannan Zhou<sup>†</sup>, Jianlong Peng<sup>†</sup>, Likun Gong<sup>†,\*</sup>,  
Jing Ren<sup>‡</sup>, Cheng Luo<sup>†</sup>, Xiaomin Luo<sup>†,\*</sup>, Hualiang Jiang<sup>†,§</sup>, Kaixian Chen<sup>†,§</sup>, Mingyue  
Zheng<sup>†,\*</sup>*

<sup>†</sup>State Key Laboratory of Drug Research, Shanghai Institute of Materia Medica,  
Chinese Academy of Sciences, 555 Zuchongzhi Road, Shanghai 201203, China

<sup>‡</sup>Center for drug safety evaluation and research, Shanghai Institute of Materia Medica,  
Chinese Academy of Sciences, 555 Zuchongzhi Road, Shanghai 201203, China

<sup>§</sup>School of Life Science and Technology, Shanghai Tech University, Shanghai 200031,  
China

\*Correspondence should be made to: Likun Gong ([lkong@cdser.simm.ac.cn](mailto:lkong@cdser.simm.ac.cn)),  
Xiaomin Luo ([xmluo@simm.ac.cn](mailto:xmluo@simm.ac.cn)) and Mingyue Zheng ([myzheng@simm.ac.cn](mailto:myzheng@simm.ac.cn))

**Supplementary Table S1.** Candidate pharmacophore hypotheses used for constructing CP model.

| In. | Hypothesis | Survival score | Survival-inactive score | Selectivity score | Train_in | Train_non | Test_in | Test_non |
|-----|------------|----------------|-------------------------|-------------------|----------|-----------|---------|----------|
| 1   | HHR1*      | 2.88           | 2.68                    | 1.10              | 10       | 47        | 12      | 58       |
| 2   | HHR2*      | 2.95           | 2.89                    | 0.97              | 8        | 15        | 7       | 21       |
| 3   | HHR3       | 2.79           | 2.22                    | 1.54              | 8        | 26        | 3       | 20       |
| 4   | HHR4       | 3.01           | 2.89                    | 1.01              | 11       | 31        | 9       | 28       |
| 5   | HHH        | 2.00           | 1.91                    | 0.88              | 9        | 42        | 7       | 50       |
| 6   | DRR*       | 2.74           | 2.60                    | 1.02              | 11       | 33        | 11      | 36       |
| 7   | DHR1       | 2.71           | 2.52                    | 1.12              | 9        | 51        | 9       | 43       |
| 8   | DHR2       | 2.88           | 2.18                    | 1.04              | 9        | 16        | 7       | 16       |
| 9   | ARR        | 3.07           | 2.99                    | 1.00              | 10       | 20        | 11      | 32       |
| 10  | APR        | 2.87           | 2.74                    | 1.25              | 11       | 31        | 14      | 26       |
| 11  | AHP        | 2.92           | 2.85                    | 1.11              | 7        | 15        | 5       | 13       |
| 12  | AHH        | 2.96           | 2.78                    | 1.09              | 6        | 42        | 8       | 54       |
| 13  | ADR        | 2.92           | 2.80                    | 1.04              | 12       | 35        | 13      | 24       |
| 14  | ADH1       | 2.91           | 2.77                    | 1.09              | 12       | 35        | 8       | 36       |
| 15  | ADH2       | 2.89           | 2.80                    | 1.07              | 10       | 25        | 5       | 23       |
| 16  | AAR        | 2.81           | 2.68                    | 0.94              | 11       | 35        | 12      | 36       |
| 17  | AAP        | 2.99           | 2.91                    | 1.31              | 8        | 15        | 5       | 16       |
| 18  | HHHR       | 2.59           | 2.19                    | 1.49              | 7        | 21        | 2       | 23       |
| 19  | DHHR       | 2.33           | 1.72                    | 1.55              | 6        | 22        | 6       | 35       |
| 20  | DDHR       | 2.37           | 1.75                    | 1.48              | 7        | 41        | 5       | 33       |
| 21  | AHPR       | 3.00           | 2.74                    | 1.65              | 7        | 8         | 5       | 8        |
| 22  | AHHR1      | 2.71           | 1.99                    | 1.49              | 7        | 33        | 6       | 35       |
| 23  | AHHR2      | 2.63           | 1.97                    | 1.50              | 7        | 32        | 6       | 36       |
| 24  | AAHP       | 2.98           | 2.27                    | 1.56              | 11       | 21        | 7       | 21       |
| 25  | AAAP1*     | 3.06           | 2.42                    | 1.62              | 11       | 22        | 7       | 24       |
| 26  | AAAP2      | 3.07           | 2.41                    | 1.59              | 9        | 23        | 7       | 21       |
| 27  | AAHHR      | 2.43           | 1.41                    | 1.74              | 8        | 37        | 7       | 31       |

Train\_in: The number of matched inhibitors in training set.

Train\_non: The number of matched noninhibitors in training set.

Test\_in: The number of matched inhibitors in test set.

Test\_non: The number of matched noninhibitors in test set.

\*The hypotheses consist of the final CP model.

**Supplementary Table S2.** The site distances of single pharmacophore hypotheses comprising the obtained CP model.

| <b>Hypothesis</b> | <b>Site1</b> | <b>Site2</b> | <b>Distance(Å)</b> |
|-------------------|--------------|--------------|--------------------|
| <b>HHR1</b>       | H2           | H1*          | 2.918              |
|                   | H2           | R1           | 3.789              |
|                   | H1           | R1           | 3.240              |
| <b>DRR</b>        | D1           | R1           | 8.614              |
|                   | D1           | R2           | 3.241              |
|                   | R1           | R2           | 7.251              |
| <b>HHR2</b>       | H2           | H1           | 6.348              |
|                   | H2           | R1           | 9.566              |
|                   | H1           | R1           | 13.153             |
| <b>AAAP</b>       | A1           | A2           | 4.575              |
|                   | A1           | A3           | 4.228              |
|                   | A1           | P1           | 8.994              |
|                   | A2           | A3           | 5.347              |
|                   | A2           | P1           | 11.229             |
|                   | A3           | P1           | 7.517              |

\*The feature numbers are used to distinguish the same type of features in the same hypothesis.

**Supplementary Table S3.** The site angles of single pharmacophore hypotheses comprising the obtained CP model.

| <b>Hypothesis</b> | <b>Site1</b> | <b>Site2</b> | <b>Site3</b> | <b>Angle(degree)</b> |
|-------------------|--------------|--------------|--------------|----------------------|
| <b>HHR1</b>       | H1*          | H2           | R1           | 56.0                 |
|                   | H2           | H1           | R1           | 75.7                 |
|                   | H2           | R1           | H1           | 48.3                 |
| <b>DRR</b>        | R1           | D1           | R2           | 54.9                 |
|                   | D1           | R1           | R2           | 21.4                 |
|                   | D1           | R2           | R1           | 103.7                |
| <b>HHR2</b>       | H1           | H2           | R1           | 109.8                |
|                   | H2           | H1           | R1           | 43.2                 |
|                   | H2           | R1           | H1           | 27.0                 |
| <b>AAAP</b>       | A2           | A1           | A3           | 74.7                 |
|                   | A2           | A1           | P1           | 107.2                |
|                   | A4           | A1           | P1           | 56.2                 |
|                   | A1           | A2           | A3           | 49.7                 |
|                   | A1           | A2           | P1           | 49.9                 |
|                   | A3           | A2           | P1           | 35.2                 |
|                   | A1           | A3           | A2           | 55.6                 |
|                   | A1           | A3           | P1           | 95.9                 |
|                   | A2           | A3           | P1           | 120.7                |
|                   | A1           | P1           | A2           | 22.9                 |
|                   | A1           | P1           | A3           | 27.9                 |
|                   | A2           | P1           | A3           | 24.2                 |

\*The feature numbers are used to distinguish the same type of features in the same hypothesis.

**Supplementary Table S4.** The spatial arrangements of HHR4 in OCT2 CP model <sup>1</sup>.

| <b>Hypothesis</b> | <b>Site1</b> | <b>Site2</b> | <b>Distance (Å)</b> |
|-------------------|--------------|--------------|---------------------|
| <b>HHR4</b>       | H1*          | H2           | 5.78                |
|                   | H1           | R            | 2.95                |
|                   | H2           | R            | 3.89                |

\*The feature numbers are used to distinguish the same type of features in the same hypothesis.

**Supplementary Table S5.** The list of all compounds used in this study

| No | Name                                            | Inhibitor<br>(Yes/No) | PubChem<br>ID |
|----|-------------------------------------------------|-----------------------|---------------|
| 1  | 1-(2-Chlorobenzoyl)-4-(Phenylmethyl)-Piperidine | Y                     | 667590        |
| 2  | Alpha-ERGOCRYPTINE                              | Y                     | 99049         |
| 3  | Amiloride                                       | Y                     | 16231         |
| 4  | Amlodipine                                      | Y                     | 2162          |
| 5  | Antimycin A                                     | Y                     | 12550         |
| 6  | Azelastine                                      | Y                     | 2267          |
| 7  | Bazedoxifene                                    | Y                     | 154257        |
| 8  | Benzethonium Chloride                           | Y                     | 8478          |
| 9  | Bexarotene                                      | Y                     | 82146         |
| 10 | Bithionol                                       | Y                     | 2406          |
| 11 | Buspirone                                       | Y                     | 2477          |
| 12 | Caffeic Acid Phenethyl Ester                    | Y                     | 108042        |
| 13 | Camostat                                        | Y                     | 2536          |
| 14 | Cetylpyridinium Bromide                         | Y                     | 8816          |
| 15 | Chlorhexidine                                   | Y                     | 62517         |
| 16 | Ciclopirox                                      | Y                     | 2749          |
| 17 | Cimetidine                                      | Y                     | 2756          |
| 18 | Closantel                                       | Y                     | 42574         |
| 19 | Danazol                                         | Y                     | 28417         |
| 20 | Dihydroergocristine Mesylate                    | Y                     | 444034        |
| 21 | Dihydroergotamine                               | Y                     | 3066          |
| 22 | Domperidone                                     | Y                     | 3151          |
| 23 | Doxazosin                                       | Y                     | 3157          |
| 24 | Droperidol                                      | Y                     | 3168          |
| 25 | D-Tubocurarine Chloride                         | Y                     | 6000          |
| 26 | Epinastine                                      | Y                     | 3241          |
| 27 | Ergocornine                                     | Y                     | 3067          |
| 28 | Ergonovine                                      | Y                     | 443884        |
| 29 | Ergotamine                                      | Y                     | 3251          |
| 30 | Ethinylestradiol                                | Y                     | 5991          |
| 31 | Famotidine                                      | Y                     | 3325          |
| 32 | Fenbendazole                                    | Y                     | 3334          |
| 33 | Gabexate                                        | Y                     | 3447          |
| 34 | Genistein                                       | Y                     | 5280961       |
| 35 | Gentian Violet                                  | Y                     | 3468          |
| 36 | Granisetron                                     | Y                     | 3510          |
| 37 | Guanfacine                                      | Y                     | 3519          |
| 38 | Hexachlorophene                                 | Y                     | 3598          |
| 39 | Idebenone                                       | Y                     | 3686          |
| 40 | Imatinib                                        | Y                     | 5291          |
| 41 | Indinavir                                       | Y                     | 60944         |
| 42 | Kitasamycin                                     | Y                     | 5282189       |
| 43 | L-744832                                        | Y                     | 6451153       |
| 44 | Lamotrigine                                     | Y                     | 3878          |
| 45 | Loperamide                                      | Y                     | 3955          |
| 46 | Maprotiline                                     | Y                     | 4011          |
| 47 | Mechlorethamine                                 | Y                     | 4033          |

(Continued)

|    |                                                  |   |         |
|----|--------------------------------------------------|---|---------|
| 48 | Medroxyprogesterone Acetate                      | Y | 6279    |
| 49 | Megestrol Acetate                                | Y | 11683   |
| 50 | Mestranol                                        | Y | 6291    |
| 51 | Metergoline                                      | Y | 28693   |
| 52 | Methylene Blue                                   | Y | 4139    |
| 53 | Mitoxantrone                                     | Y | 4212    |
| 54 | Mosapride                                        | Y | 119584  |
| 55 | Niacin                                           | Y | 938     |
| 56 | Nifekalant                                       | Y | 4486    |
| 57 | Norethindrone Acetate                            | Y | 5832    |
| 58 | Norgestrel                                       | Y | 13109   |
| 59 | Ondansetron                                      | Y | 4595    |
| 60 | Oxymetazoline                                    | Y | 4636    |
| 61 | Oxytocin                                         | Y | 439302  |
| 62 | Pantoprazole                                     | Y | 4679    |
| 63 | Pentamidine                                      | Y | 4735    |
| 64 | Perospirone                                      | Y | 115368  |
| 65 | Phenacetin                                       | Y | 4754    |
| 66 | Podophyllotoxin                                  | Y | 10607   |
| 67 | Prazosin                                         | Y | 4893    |
| 68 | Propoxyphene                                     | Y | 10100   |
| 69 | Rimantadine                                      | Y | 5071    |
| 70 | Ritonavir                                        | Y | 392622  |
| 71 | Rwj-68354                                        | Y | 9819053 |
| 72 | Salicylic Acid                                   | Y | 338     |
| 73 | Selegiline                                       | Y | 5195    |
| 74 | Sildenafil                                       | Y | 5212    |
| 75 | Sulfacetamide                                    | Y | 5320    |
| 76 | Sulindac Sulfide                                 | Y | 5352624 |
| 77 | Tannic Acid                                      | Y | 250395  |
| 78 | Terconazole                                      | Y | 441383  |
| 79 | Thiabendazole                                    | Y | 5430    |
| 80 | Topotecan                                        | Y | 60700   |
| 81 | Trazodone                                        | Y | 5533    |
| 82 | Tropisetron                                      | Y | 656665  |
| 83 | Vecuronium Bromide                               | Y | 39764   |
| 84 | Zafirlukast                                      | Y | 5717    |
| 85 | (-)-Thalidomide                                  | N | 92142   |
| 86 | (+)-Thalidomide                                  | N | 75792   |
| 87 | (R)-Bicalutamide                                 | N | 2375    |
| 88 | (S)-(-)-Pindolol                                 | N | 688095  |
| 89 | 1-(2-Fluorobenzoyl)-4-(Phenylmethyl)-Piperidine  | N | 667749  |
| 90 | 1-(2-Methoxybenzoyl)-4-(Phenylmethyl)-Piperidine | N | 667750  |
| 91 | 1-(2-Methylbenzoyl)-4-(Phenylmethyl)-Piperidine  | N | 1379258 |
| 92 | 1,3-Diphenylguanidine                            | N | 7594    |
| 93 | 10,11-Dihydro-Carbamazepine                      | N | 19099   |
| 94 | 17-Methyltestosterone                            | N | 6010    |
| 95 | 1-Aminobenzotriazole                             | N | 1367    |
| 96 | 1-Benzylimidazole                                | N | 77918   |

(Continued)

|     |                                                            |   |          |
|-----|------------------------------------------------------------|---|----------|
| 97  | 1-Naphthyl Isothiocyanate                                  | N | 11080    |
| 98  | 2-Acetylaminofluorene                                      | N | 5897     |
| 99  | 2-HYDROXYPROPYL-Beta-CYCLODEXTRIN                          | N | 44134771 |
| 100 | 2-Mercaptobenzothiazole                                    | N | 697993   |
| 101 | 3,3',4',5-Tetrachlorosalicylanilide                        | N | 14385    |
| 102 | 3-Acetamidophenol                                          | N | 12124    |
| 103 | 3-Aminobenzamide                                           | N | 1645     |
| 104 | 4-(Phenylmethyl)-1-[2-(Trifluoromethyl)Benzoyl]-Piperidine | N | 17683252 |
| 105 | 4,4'-Diethylaminoethoxyhexestrol                           | N | 66143    |
| 106 | 4-Amino-1,8-Naphthalimide                                  | N | 1720     |
| 107 | 4-Methylpyrazole                                           | N | 3406     |
| 108 | 4-Nitrobenzoic Acid                                        | N | 6108     |
| 109 | 4-Nonylphenol                                              | N | 1752     |
| 110 | 4-Octylphenol                                              | N | 15730    |
| 111 | 5-Fluoro-2'-Deoxyuridine                                   | N | 5790     |
| 112 | 6(5h)-Phenanthridinone                                     | N | 1853     |
| 113 | 6-Mercaptopurine                                           | N | 667490   |
| 114 | 6-Methoxy-2-Naphthylacetic Acid                            | N | 32176    |
| 115 | 8-Azaguanine                                               | N | 8646     |
| 116 | Acarbose                                                   | N | 41774    |
| 117 | Aceclofenac                                                | N | 71771    |
| 118 | Acemetacin                                                 | N | 1981     |
| 119 | Acetaminophen                                              | N | 1983     |
| 120 | Acetazolamide                                              | N | 1986     |
| 121 | Acetylcholine Chloride                                     | N | 6060     |
| 122 | Acetylcysteine                                             | N | 12035    |
| 123 | Aclarubicin                                                | N | 2008     |
| 124 | Aconitine                                                  | N | 2012     |
| 125 | Actarit                                                    | N | 2018     |
| 126 | Acyclovir                                                  | N | 2022     |
| 127 | Adapalene                                                  | N | 60164    |
| 128 | Adrenosterone                                              | N | 223997   |
| 129 | Albendazole                                                | N | 2082     |
| 130 | Alfacalcidol                                               | N | 2091     |
| 131 | Allopurinol                                                | N | 2094     |
| 132 | Alpha-CYCLODEXTRIN                                         | N | 24796    |
| 133 | Alpha-CYPERMETHRIN                                         | N | 49833    |
| 134 | Alpha-NAPHTHOFLAVONE                                       | N | 11790    |
| 135 | Alprazolam                                                 | N | 2118     |
| 136 | Alprenolol                                                 | N | 2119     |
| 137 | Alprostadi                                                 | N | 5280723  |
| 138 | Aluminum Lactate                                           | N | 92422    |
| 139 | Amantadine                                                 | N | 2130     |
| 140 | Ambroxol                                                   | N | 2132     |
| 141 | Aminacrine                                                 | N | 7019     |
| 142 | Amineptine                                                 | N | 34870    |
| 143 | Aminoglutethimide                                          | N | 2145     |
| 144 | Aminopterin                                                | N | 169371   |
| 145 | Aminosalicylic Acid                                        | N | 4649     |



(Continued)

---

|     |                             |   |          |
|-----|-----------------------------|---|----------|
| 146 | Amiodarone                  | N | 2157     |
| 147 | Amitraz                     | N | 36324    |
| 148 | Amitriptyline               | N | 2160     |
| 149 | Amorolfine                  | N | 2168     |
| 150 | Amphotericin B              | N | 14956    |
| 151 | Ampiroxicam                 | N | 2176     |
| 152 | Amprenavir                  | N | 44342222 |
| 153 | Amrinone                    | N | 3698     |
| 154 | Amsulosin                   | N | 121829   |
| 155 | Amygdalin(D)                | N | 2180     |
| 156 | Anastrozole                 | N | 2187     |
| 157 | Androsterone                | N | 5879     |
| 158 | Aniracetam                  | N | 2196     |
| 159 | Anisindione                 | N | 2197     |
| 160 | Antazoline                  | N | 2200     |
| 161 | Antipyrine                  | N | 2206     |
| 162 | Artemether                  | N | 68911    |
| 163 | Artemisinin                 | N | 68827    |
| 164 | Ascorbic Acid               | N | 54670067 |
| 165 | Aspirin                     | N | 2244     |
| 166 | Astemizole                  | N | 2247     |
| 167 | Atenolol                    | N | 2249     |
| 168 | Atractyloside               | N | 2255     |
| 169 | Atropine                    | N | 3661     |
| 170 | Auranofin                   | N | 6918453  |
| 171 | Azacitidine                 | N | 9444     |
| 172 | Azaribine                   | N | 16574    |
| 173 | Azaserine                   | N | 830      |
| 174 | Azathioprine                | N | 2265     |
| 175 | Azauridine                  | N | 5901     |
| 176 | Azelaic Acid                | N | 2266     |
| 177 | Azithromycin                | N | 55185    |
| 178 | Azlocillin                  | N | 2271     |
| 179 | Aztreonam                   | N | 2274     |
| 180 | Bacitracin                  | N | 2283     |
| 181 | Balsalazide                 | N | 5362070  |
| 182 | Bay 11-7085                 | N | 6603741  |
| 183 | Beclomethasone              | N | 20469    |
| 184 | Beclomethasone Dipropionate | N | 21700    |
| 185 | Bemegride                   | N | 2310     |
| 186 | Benazepril                  | N | 5362124  |
| 187 | Bendazac                    | N | 2313     |
| 188 | Bendroflumethiazide         | N | 2315     |
| 189 | Benoxaprofen                | N | 39941    |
| 190 | Benoxinate                  | N | 4633     |
| 191 | Benserazide                 | N | 2327     |
| 192 | Benzo[A]Pyrene              | N | 2336     |
| 193 | Benzo[E]Pyrene              | N | 9128     |
| 194 | Benzoic Acid                | N | 243      |

---

(Continued)

---

|     |                           |   |         |
|-----|---------------------------|---|---------|
| 195 | Benztropine               | N | 441353  |
| 196 | Benzyl Alcohol            | N | 244     |
| 197 | Beta Cyclodextrin         | N | 444294  |
| 198 | Beta-ESTRADIOL            | N | 5757    |
| 199 | Beta-ESTRADIOL 3-BENZOATE | N | 222757  |
| 200 | Betahistine               | N | 2366    |
| 201 | Betaine                   | N | 247     |
| 202 | Betamethasone             | N | 9782    |
| 203 | Betamipron                | N | 71651   |
| 204 | Beta-NAPHTHOFLAVONE       | N | 2361    |
| 205 | Bezafibrate               | N | 39042   |
| 206 | Bifonazole                | N | 2378    |
| 207 | Bisacodyl                 | N | 2391    |
| 208 | Bisphenol A               | N | 6623    |
| 209 | Bopindolol                | N | 44112   |
| 210 | Boric Acid                | N | 7628    |
| 211 | Bretylum Tosylate         | N | 2431    |
| 212 | Brilliant Green           | N | 12450   |
| 213 | Brimonidine               | N | 2435    |
| 214 | Bromfenac                 | N | 60726   |
| 215 | Bromhexine                | N | 2442    |
| 216 | Bromisovalum              | N | 1176    |
| 217 | Brompheniramine           | N | 6834    |
| 218 | Budesonide                | N | 5281004 |
| 219 | Bufexamac                 | N | 2466    |
| 220 | Buflomedil                | N | 2467    |
| 221 | Buformin                  | N | 2468    |
| 222 | Bupivacaine Hydrochloride | N | 64737   |
| 223 | Bupropion                 | N | 444     |
| 224 | Busulfan                  | N | 2478    |
| 225 | Butamben                  | N | 2482    |
| 226 | Butenafine                | N | 2484    |
| 227 | Butylparaben              | N | 7184    |
| 228 | C8 Ceramide               | N | 5702614 |
| 229 | Cadmium Acetate           | N | 10986   |
| 230 | Caffeine                  | N | 2519    |
| 231 | Calcitriol                | N | 2524    |
| 232 | Candesartan               | N | 2541    |
| 233 | Cantharidin               | N | 2545    |
| 234 | Capsaicin                 | N | 2548    |
| 235 | Captopril                 | N | 2550    |
| 236 | Carbachol                 | N | 2551    |
| 237 | Carbamazepine             | N | 2554    |
| 238 | Carbimazole               | N | 31072   |
| 239 | Carbinoxamine             | N | 2564    |
| 240 | Carisoprodol              | N | 2576    |
| 241 | Carmofur                  | N | 2577    |
| 242 | Carmustine                | N | 2578    |
| 243 | Carvedilol                | N | 2585    |

---

(Continued)

---

|     |                         |   |         |
|-----|-------------------------|---|---------|
| 244 | Cefdinir                | N | 6398970 |
| 245 | Cefixime                | N | 2675    |
| 246 | Cefmetazole             | N | 2626    |
| 247 | Cefotaxime              | N | 2632    |
| 248 | Cefpodoxime Proxetil    | N | 441393  |
| 249 | Cefuroxime              | N | 2659    |
| 250 | Celecoxib               | N | 2662    |
| 251 | Cerivastatin            | N | 2676    |
| 252 | Cetirizine              | N | 2678    |
| 253 | Cetraxate               | N | 2680    |
| 254 | Chlordiazepoxide        | N | 2712    |
| 255 | Chlormadinone Acetate   | N | 9324    |
| 256 | Chlorobutanol           | N | 5977    |
| 257 | Chlorothiazide          | N | 2720    |
| 258 | Chloroxylenol           | N | 2723    |
| 259 | Chlorphenesin Carbamate | N | 2724    |
| 260 | Chlorpheniramine        | N | 2725    |
| 261 | Chlorpromazine          | N | 2726    |
| 262 | Chlorpropamide          | N | 2727    |
| 263 | Chlorprothixene         | N | 2729    |
| 264 | Chlorquinaldol          | N | 6301    |
| 265 | Chlorzoxazone           | N | 2733    |
| 266 | Cholecalciferol         | N | 5283711 |
| 267 | Cholic Acid             | N | 221493  |
| 268 | Choline Chloride        | N | 6209    |
| 269 | Cilostazol              | N | 2754    |
| 270 | Cinnamaldehyde          | N | 307     |
| 271 | Cinnarizine             | N | 2761    |
| 272 | Cisapride               | N | 2769    |
| 273 | Citalopram              | N | 2771    |
| 274 | Citric Acid             | N | 311     |
| 275 | Cladribine              | N | 1546    |
| 276 | Clarithromycin          | N | 54688   |
| 277 | Clebopride              | N | 2780    |
| 278 | Clenbuterol             | N | 2783    |
| 279 | Clidinium Bromide       | N | 19004   |
| 280 | Clioquinol              | N | 2788    |
| 281 | Clobetasol Propionate   | N | 32798   |
| 282 | Clofibric Acid          | N | 2797    |
| 283 | Clomacran               | N | 21382   |
| 284 | Clomiphene              | N | 60974   |
| 285 | Clomipramine            | N | 2801    |
| 286 | Clonazepam              | N | 2802    |
| 287 | Clonidine               | N | 2803    |
| 288 | Clopidogrel             | N | 2806    |
| 289 | Clorprenaline           | N | 2810    |
| 290 | Clotrimazole            | N | 2812    |
| 291 | Cloxacillin             | N | 6098    |
| 292 | Clozapine               | N | 2818    |

---

(Continued)

---

|     |                            |   |         |
|-----|----------------------------|---|---------|
| 293 | Cobalt(Ii) Acetylacetonate | N | 407383  |
| 294 | Cocculin                   | N | 5311359 |
| 295 | Colchicine                 | N | 6167    |
| 296 | Colistin                   | N | 73091   |
| 297 | Cortisone                  | N | 5753    |
| 298 | Coumarin                   | N | 323     |
| 299 | Cromolyn                   | N | 2882    |
| 300 | Crotamiton                 | N | 6604255 |
| 301 | Cyclandelate               | N | 2893    |
| 302 | Cyclobenzaprine            | N | 2895    |
| 303 | Cycloheximide              | N | 6197    |
| 304 | Cyclophosphamide           | N | 2907    |
| 305 | Cyproheptadine             | N | 2913    |
| 306 | Cyproterone Acetate        | N | 9880    |
| 307 | Cyromazine                 | N | 47866   |
| 308 | Cytarabine                 | N | 6253    |
| 309 | Dacarbazine                | N | 5281007 |
| 310 | Dactinomycin               | N | 2019    |
| 311 | Dapiprazole                | N | 3033538 |
| 312 | Dapsone                    | N | 2955    |
| 313 | Daunorubicin               | N | 30323   |
| 314 | D-Camphor                  | N | 159055  |
| 315 | Deferoxamine               | N | 2973    |
| 316 | Dehydrocholic Acid         | N | 6674    |
| 317 | Dequalinium Chloride       | N | 2993    |
| 318 | Desipramine                | N | 2995    |
| 319 | Deslanoside                | N | 2996    |
| 320 | Desloratadine              | N | 124087  |
| 321 | Desoximetasone             | N | 5311067 |
| 322 | Dexamethasone              | N | 5743    |
| 323 | Dexamethasone Phosphate    | N | 9400    |
| 324 | Dexbrompheniramine         | N | 16960   |
| 325 | Dexchlorpheniramine        | N | 33036   |
| 326 | Dexfenfluramine            | N | 65801   |
| 327 | Dexibuprofen               | N | 39912   |
| 328 | Dexketoprofen              | N | 667550  |
| 329 | Dexpanthenol               | N | 131204  |
| 330 | Dextromethorphan           | N | 5362449 |
| 331 | D-Galactosamine            | N | 2794221 |
| 332 | Diazepam                   | N | 3016    |
| 333 | Diazoxide                  | N | 3019    |
| 334 | Dibucaine                  | N | 3025    |
| 335 | Dichlorvos                 | N | 3039    |
| 336 | Diclofenac                 | N | 3033    |
| 337 | Dicyclomine                | N | 3042    |
| 338 | Didanosine                 | N | 3043    |
| 339 | Dideoxycytidine            | N | 24066   |
| 340 | Dieldrin                   | N | 969491  |
| 341 | Diethylcarbamazine         | N | 3052    |

---

(Continued)

---

|     |                         |   |         |
|-----|-------------------------|---|---------|
| 342 | Diethylstilbestrol      | N | 448537  |
| 343 | Diflorasone Diacetate   | N | 71414   |
| 344 | Diflunisal              | N | 3059    |
| 345 | Digitonin               | N | 25444   |
| 346 | Digitoxin               | N | 3061    |
| 347 | Digoxin                 | N | 3062    |
| 348 | Diltiazem               | N | 39186   |
| 349 | Dimenhydrinate          | N | 10660   |
| 350 | Diphenhydramine         | N | 3100    |
| 351 | Diphenidol              | N | 3055    |
| 352 | Dipyridamole            | N | 3108    |
| 353 | Disopyramide            | N | 3114    |
| 354 | Disulfiram              | N | 3117    |
| 355 | Dobutamine              | N | 36811   |
| 356 | Docetaxel               | N | 64780   |
| 357 | Donepezil               | N | 3152    |
| 358 | Doxapram                | N | 3156    |
| 359 | Doxepin                 | N | 667477  |
| 360 | Doxifluridine           | N | 3159    |
| 361 | Doxofylline             | N | 50942   |
| 362 | Doxorubicin             | N | 31703   |
| 363 | Doxycycline             | N | 373075  |
| 364 | Dyclonine Hydrochloride | N | 3180    |
| 365 | Dyphylline              | N | 3182    |
| 366 | Ebastine                | N | 3191    |
| 367 | Econazole               | N | 3198    |
| 368 | Edaravone               | N | 4021    |
| 369 | Edrophonium Chloride    | N | 8307    |
| 370 | Efavirenz               | N | 3203    |
| 371 | Emetine                 | N | 10219   |
| 372 | Enalapril               | N | 5362032 |
| 373 | Enrofloxacin            | N | 71188   |
| 374 | Epalrestat              | N | 1549120 |
| 375 | Eperisone               | N | 3236    |
| 376 | Epirubicin              | N | 41867   |
| 377 | Erythromycin            | N | 3255    |
| 378 | Erythromycin Propionate | N | 3258    |
| 379 | Esmolol                 | N | 59768   |
| 380 | Estriol                 | N | 5756    |
| 381 | Estrone                 | N | 5870    |
| 382 | Ethacrynic Acid         | N | 3278    |
| 383 | Ethambutol              | N | 3279    |
| 384 | Ethionamide             | N | 3284    |
| 385 | Ethisterone             | N | 5284557 |
| 386 | Ethosuximide            | N | 3291    |
| 387 | Ethylenediamine         | N | 3301    |
| 388 | Ethylestrenol           | N | 13765   |
| 389 | Ethylparaben            | N | 8434    |
| 390 | Ethynodiol Diacetate    | N | 9270    |

---

(Continued)

|     |                             |   |         |
|-----|-----------------------------|---|---------|
| 391 | Etodolac                    | N | 3308    |
| 392 | Etoposide                   | N | 3310    |
| 393 | Eucalyptol (Cineole)        | N | 2758    |
| 394 | Exemestane                  | N | 60198   |
| 395 | Felbinac                    | N | 3332    |
| 396 | Felodipine                  | N | 3333    |
| 397 | Fenbufen                    | N | 3335    |
| 398 | Fenofibrate                 | N | 3339    |
| 399 | Fenoprofen                  | N | 3342    |
| 400 | Ferulic Acid                | N | 709     |
| 401 | Fexofenadine                | N | 3348    |
| 402 | Finasteride                 | N | 57363   |
| 403 | Fluconazole                 | N | 3365    |
| 404 | Flucytosine                 | N | 3366    |
| 405 | Fludarabine                 | N | 30751   |
| 406 | Fludrocortisone Acetate     | N | 225609  |
| 407 | Flufenamic Acid             | N | 3371    |
| 408 | Flumazenil                  | N | 3373    |
| 409 | Flunarizine                 | N | 941361  |
| 410 | Flunisolide                 | N | 82153   |
| 411 | Flunoxaprofen               | N | 39940   |
| 412 | Fluocinolone Acetonide      | N | 6215    |
| 413 | Fluocinonide                | N | 9642    |
| 414 | Fluorometholone             | N | 9878    |
| 415 | Fluorouracil                | N | 3385    |
| 416 | Fluoxetine                  | N | 3386    |
| 417 | Fluphenazine                | N | 3372    |
| 418 | Flurandrenolide             | N | 15209   |
| 419 | Flurbiprofen                | N | 3394    |
| 420 | Folic Acid                  | N | 3405    |
| 421 | Formoterol                  | N | 3410    |
| 422 | Furazolidone                | N | 5323714 |
| 423 | Furosemide                  | N | 3440    |
| 424 | Galantamine                 | N | 3449    |
| 425 | Gallamine Triethiodide      | N | 3450    |
| 426 | Gamma-Cyclodextrin          | N | 86575   |
| 427 | Ganciclovir                 | N | 3454    |
| 428 | Gemcitabine                 | N | 3461    |
| 429 | Gemfibrozil                 | N | 3463    |
| 430 | Genaconazole (RR(+)) Isomer | N | 60741   |
| 431 | Geraniol                    | N | 637566  |
| 432 | Gliclazide                  | N | 3475    |
| 433 | Glimepiride                 | N | 3476    |
| 434 | Glipizide                   | N | 3478    |
| 435 | Glyburide                   | N | 3488    |
| 436 | Glycolic Acid               | N | 757     |
| 437 | Glycyrrhizin                | N | 14982   |
| 438 | Goserelin                   | N | 47725   |
| 439 | Gramicidin                  | N | 73357   |

(Continued)

---

|     |                          |   |         |
|-----|--------------------------|---|---------|
| 440 | Griseofulvin             | N | 3512    |
| 441 | Guaifenesin              | N | 3516    |
| 442 | Guanabenz                | N | 3517    |
| 443 | GW-1929                  | N | 6518171 |
| 444 | Halcinonide              | N | 443943  |
| 445 | Haloperidol              | N | 3559    |
| 446 | Haloproglin              | N | 3561    |
| 447 | Homatropine Hydrobromide | N | 5821    |
| 448 | Homochlorcyclizine       | N | 3627    |
| 449 | Huperzine A              | N | 1253    |
| 450 | Hydralazine              | N | 3637    |
| 451 | Hydrazine                | N | 9321    |
| 452 | Hydrochlorothiazide      | N | 3639    |
| 453 | Hydrocortisone           | N | 5754    |
| 454 | Hydroflumethiazide       | N | 3647    |
| 455 | Hydroxyprogesterone      | N | 6238    |
| 456 | Hydroxyurea              | N | 3657    |
| 457 | Hydroxyzine              | N | 3658    |
| 458 | Hymecromone              | N | 5280567 |
| 459 | Hyoscyamine              | N | 64692   |
| 460 | Ibudilast                | N | 3671    |
| 461 | Ibuprofen                | N | 3672    |
| 462 | Icodextrin               | N | 79025   |
| 463 | Idarubicin               | N | 42593   |
| 464 | Idoxuridine              | N | 3687    |
| 465 | Ifosfamide               | N | 3690    |
| 466 | Imipramine               | N | 3696    |
| 467 | Indapamide               | N | 3702    |
| 468 | Indomethacin             | N | 3715    |
| 469 | Inosine                  | N | 804     |
| 470 | Inositol                 | N | 892     |
| 471 | Iodoquinol               | N | 3728    |
| 472 | Ipratropium Bromide      | N | 31098   |
| 473 | Ipriflavone              | N | 3747    |
| 474 | Iproniazid               | N | 3748    |
| 475 | Irbesartan               | N | 3749    |
| 476 | Irinotecan               | N | 3750    |
| 477 | Irsogladine Maleate      | N | 5282435 |
| 478 | Isoeugenol               | N | 1549041 |
| 479 | Isoniazid                | N | 3767    |
| 480 | Isoprenaline             | N | 3779    |
| 481 | Isopropamide Iodide      | N | 6284    |
| 482 | Isotretinoin             | N | 5282379 |
| 483 | Itopride                 | N | 3792    |
| 484 | Ivermectin               | N | 3085416 |
| 485 | Kainic Acid              | N | 3816    |
| 486 | Ketamine                 | N | 3821    |
| 487 | Ketoprofen               | N | 3825    |
| 488 | Ketorolac                | N | 3826    |

---

(Continued)

---

|     |                     |   |         |
|-----|---------------------|---|---------|
| 489 | Ketotifen           | N | 3827    |
| 490 | Labetalol           | N | 3869    |
| 491 | Lacidipine          | N | 68733   |
| 492 | Lactulose           | N | 3872    |
| 493 | Lafutidine          | N | 3873    |
| 494 | Lamivudine          | N | 3877    |
| 495 | Lansoprazole        | N | 3883    |
| 496 | L-Camphor           | N | 444795  |
| 497 | Leflunomide         | N | 3899    |
| 498 | Letrozole           | N | 3902    |
| 499 | Leuprolide          | N | 3911    |
| 500 | Levobunolol         | N | 39468   |
| 501 | Levobupivacaine     | N | 2474    |
| 502 | Levodopa            | N | 6047    |
| 503 | Levofloxacin        | N | 149096  |
| 504 | Lidocaine           | N | 3676    |
| 505 | Lincomycin          | N | 3928    |
| 506 | Linezolid           | N | 3929    |
| 507 | Lisuride            | N | 28864   |
| 508 | Lomerizine          | N | 3949    |
| 509 | Lomustine           | N | 3950    |
| 510 | Loratadine          | N | 3957    |
| 511 | Lorazepam           | N | 3958    |
| 512 | Losartan            | N | 3961    |
| 513 | Lovastatin          | N | 3962    |
| 514 | L-Phenylephrine     | N | 6041    |
| 515 | Lysergol            | N | 3982    |
| 516 | Mannitol            | N | 453     |
| 517 | Mc 258714           | N | 3385213 |
| 518 | Mc 258717           | N | 3421241 |
| 519 | Mc 288769           | N | 1378765 |
| 520 | Mebeverine          | N | 4031    |
| 521 | Meclizine           | N | 4034    |
| 522 | Meclofenamic Acid   | N | 4037    |
| 523 | Meclofenoxate       | N | 4039    |
| 524 | Medroxyprogesterone | N | 10631   |
| 525 | Mefenamic Acid      | N | 4044    |
| 526 | Melatonin           | N | 896     |
| 527 | Menatetrenone       | N | 4056    |
| 528 | Mepazine            | N | 6075    |
| 529 | Mepenzolate Bromide | N | 4057    |
| 530 | Mepivacaine         | N | 4062    |
| 531 | Meropenem           | N | 441130  |
| 532 | Mesalamine          | N | 4075    |
| 533 | Mesna               | N | 598     |
| 534 | Mestanolone         | N | 10633   |
| 535 | Metaraminol         | N | 4087    |
| 536 | Metformin           | N | 4091    |
| 537 | Methapyrilene       | N | 4098    |

---



(Continued)

---

|     |                                  |   |         |
|-----|----------------------------------|---|---------|
| 538 | Methazolamide                    | N | 4100    |
| 539 | Methimazole                      | N | 1349907 |
| 540 | Methocarbamol                    | N | 4107    |
| 541 | Methotrexate                     | N | 126941  |
| 542 | Methoxamine                      | N | 6082    |
| 543 | Methoxsalen (Xanthtoxin)         | N | 4114    |
| 544 | Methscopolamine Bromide          | N | 5459110 |
| 545 | Methychlothiazide                | N | 4121    |
| 546 | Methyl Salicylate                | N | 4133    |
| 547 | Methylergonovine                 | N | 4140    |
| 548 | Methylparaben                    | N | 7456    |
| 549 | Metoclopramide                   | N | 4168    |
| 550 | Metolazone                       | N | 4170    |
| 551 | Metoprolol                       | N | 4171    |
| 552 | Metrifonate                      | N | 5853    |
| 553 | Metyrapone                       | N | 4174    |
| 554 | Mevastatin                       | N | 2854    |
| 555 | Mexiletine                       | N | 4178    |
| 556 | Mianserin                        | N | 4184    |
| 557 | Miconazole                       | N | 4189    |
| 558 | Midecamycin                      | N | 290482  |
| 559 | Midodrine                        | N | 4195    |
| 560 | Mifepristone                     | N | 55245   |
| 561 | Milrinone                        | N | 4197    |
| 562 | Minaprine                        | N | 4199    |
| 563 | Minoxidil                        | N | 4201    |
| 564 | Mirtazapine                      | N | 4205    |
| 565 | Misoprostol                      | N | 4183806 |
| 566 | Mitotane                         | N | 4211    |
| 567 | Moclobemide                      | N | 4235    |
| 568 | Modafinil                        | N | 4236    |
| 569 | Mometasone Furoate               | N | 55188   |
| 570 | Monobenzone                      | N | 7638    |
| 571 | Monocrotaline                    | N | 9415    |
| 572 | Montelukast                      | N | 5281040 |
| 573 | Moxonidine                       | N | 4810    |
| 574 | Mycophenolate Mofetil            | N | 5281078 |
| 575 | Myrtecaine                       | N | 71851   |
| 576 | N,N'-Diphenyl-P-Phenylenediamine | N | 6319    |
| 577 | Nabumetone                       | N | 4409    |
| 578 | Nadolol                          | N | 4411    |
| 579 | Nafenopin                        | N | 19592   |
| 580 | Naftopidil                       | N | 4418    |
| 581 | Nalbuphine                       | N | 5311304 |
| 582 | Nalidixic Acid                   | N | 4421    |
| 583 | Naloxonazine                     | N | 4424    |
| 584 | Naloxone                         | N | 5284596 |
| 585 | Nandrolone                       | N | 9904    |
| 586 | Naphazoline                      | N | 4436    |

---

(Continued)

---

|     |                         |   |         |
|-----|-------------------------|---|---------|
| 587 | Naproxen                | N | 1302    |
| 588 | Nateglinide             | N | 4443    |
| 589 | Nefazodone              | N | 4449    |
| 590 | Nelfinavir              | N | 4451    |
| 591 | Neostigmine Bromide     | N | 4456    |
| 592 | Niacinamide             | N | 936     |
| 593 | Nicardipine             | N | 4474    |
| 594 | Nifedipine              | N | 4485    |
| 595 | Niflumic Acid           | N | 4488    |
| 596 | Nifursol                | N | 28140   |
| 597 | Nilutamide              | N | 4493    |
| 598 | Nimesulide              | N | 4495    |
| 599 | Nimetazepam             | N | 4496    |
| 600 | Nimodipine              | N | 4497    |
| 601 | Nisoldipine             | N | 4499    |
| 602 | Nitrazepam              | N | 4506    |
| 603 | Nitrendipine            | N | 4507    |
| 604 | Nitrofurantoin          | N | 4509    |
| 605 | Nitrofurazone           | N | 1839    |
| 606 | Nizatidine              | N | 4513    |
| 607 | Nocodazole              | N | 4122    |
| 608 | Norepinephrine          | N | 951     |
| 609 | Norethindrone           | N | 6230    |
| 610 | Norfloxacine            | N | 4539    |
| 611 | Nortriptyline           | N | 4543    |
| 612 | Noscapine               | N | 4544    |
| 613 | Novartis P-38 Inhibitor | N | 9819930 |
| 614 | Ns-398                  | N | 4553    |
| 615 | Nylidrin                | N | 4567    |
| 616 | Nystatin                | N | 3468412 |
| 617 | Octreotide              | N | 54374   |
| 618 | Olanzapine              | N | 4585    |
| 619 | Omeprazole              | N | 4594    |
| 620 | Orlistat                | N | 4599    |
| 621 | Orphenadrine            | N | 4601    |
| 622 | Ouabain                 | N | 439501  |
| 623 | Oxaliplatin             | N | 43805   |
| 624 | Oxaprozin               | N | 4614    |
| 625 | Oxatomide               | N | 4615    |
| 626 | Oxcarbazepine           | N | 34312   |
| 627 | Oxfendazole             | N | 40854   |
| 628 | Oxiconazole             | N | 4623    |
| 629 | Oxybenzone              | N | 4632    |
| 630 | Oxybutynin              | N | 4634    |
| 631 | Oxymetholone            | N | 3032303 |
| 632 | Oxyquinoline            | N | 1923    |
| 633 | Pancuronium Bromide     | N | 27350   |
| 634 | Panthenol               | N | 4678    |
| 635 | Pantothenic Acid        | N | 988     |

---

(Continued)

---

|     |                        |   |         |
|-----|------------------------|---|---------|
| 636 | Paroxetine             | N | 4691    |
| 637 | Parthenolide           | N | 927704  |
| 638 | Pemoline               | N | 4723    |
| 639 | Penciclovir            | N | 4725    |
| 640 | Penicillic Acid        | N | 304729  |
| 641 | Penicillin G           | N | 2349    |
| 642 | Pentoxifylline         | N | 4740    |
| 643 | Perflubron             | N | 9873    |
| 644 | Perflunafene           | N | 9386    |
| 645 | Pergolide              | N | 4745    |
| 646 | Perhexiline            | N | 4746    |
| 647 | Perphenazine           | N | 4748    |
| 648 | Phenacemide            | N | 4753    |
| 649 | Phenazopyridine        | N | 4756    |
| 650 | Phenelzine             | N | 3675    |
| 651 | Phenformin             | N | 8249    |
| 652 | Phenindione            | N | 4760    |
| 653 | Pheniramine            | N | 4761    |
| 654 | Phenobarbital          | N | 4763    |
| 655 | Phenol                 | N | 996     |
| 656 | Phenothiazine          | N | 7108    |
| 657 | Phenoxybenzamine       | N | 4768    |
| 658 | Phenprobamate          | N | 4770    |
| 659 | Phentolamine           | N | 5775    |
| 660 | Phenyl Salicylate      | N | 8361    |
| 661 | Phenylbutazone         | N | 4781    |
| 662 | Phenylhydrazine        | N | 7516    |
| 663 | Phenylpropanolamine    | N | 4786    |
| 664 | Phenyltoloxamine       | N | 7077    |
| 665 | Physostigmine          | N | 4811    |
| 666 | Piclamilast            | N | 154575  |
| 667 | Pilocarpine            | N | 5910    |
| 668 | Pindolol               | N | 4828    |
| 669 | Pioglitazone           | N | 4829    |
| 670 | Piperacillin           | N | 31864   |
| 671 | Piperilate Ethobromide | N | 168088  |
| 672 | Piracetam              | N | 4843    |
| 673 | Polymyxin B1           | N | 199402  |
| 674 | P-Phenylenediamine     | N | 7814    |
| 675 | Pralidoxime Chloride   | N | 5353894 |
| 676 | Pramoxine              | N | 4886    |
| 677 | Pravastatin            | N | 4889    |
| 678 | Praziquantel           | N | 4891    |
| 679 | Prednisolone           | N | 5755    |
| 680 | Prednisone             | N | 5865    |
| 681 | Pridinol               | N | 4904    |
| 682 | Prilocaine             | N | 4906    |
| 683 | Primaquine             | N | 4908    |
| 684 | Primidone              | N | 44909   |

---

(Continued)

---

|     |                       |   |         |
|-----|-----------------------|---|---------|
| 685 | Prinomastat           | N | 466151  |
| 686 | Probenecid            | N | 4911    |
| 687 | Probucol              | N | 4912    |
| 688 | Procainamide          | N | 4913    |
| 689 | Procaine              | N | 4914    |
| 690 | Procarbazine          | N | 4915    |
| 691 | Prochlorperazine      | N | 4917    |
| 692 | Procyclidine          | N | 4919    |
| 693 | Proglumide            | N | 4922    |
| 694 | Promazine             | N | 4926    |
| 695 | Promethazine          | N | 4927    |
| 696 | Propafenone           | N | 4932    |
| 697 | Propantheline Bromide | N | 4934    |
| 698 | Proparacaine          | N | 4935    |
| 699 | Propofol              | N | 4943    |
| 700 | Propranolol           | N | 4946    |
| 701 | Propylene Glycol      | N | 1030    |
| 702 | Propylparaben         | N | 7175    |
| 703 | Propylthiouracil      | N | 657298  |
| 704 | Proscillaridin        | N | 5284613 |
| 705 | Pseudoephedrine       | N | 7028    |
| 706 | Puromycin             | N | 4984    |
| 707 | Pyrazinamide          | N | 1046    |
| 708 | Pyridoxine            | N | 1054    |
| 709 | Pyrilamine            | N | 4992    |
| 710 | Pyrithione Zinc       | N | 26041   |
| 711 | Pyrogallol            | N | 1057    |
| 712 | Quetiapine            | N | 5002    |
| 713 | Quinapril             | N | 54892   |
| 714 | Quinidine             | N | 441074  |
| 715 | Quinine               | N | 3034034 |
| 716 | R(-)-Apomorphine      | N | 6005    |
| 717 | R(-)-Ibuprofen        | N | 114864  |
| 718 | R-(+)-Propranolol     | N | 21138   |
| 719 | Rabeprazole           | N | 5029    |
| 720 | Racpinephrine         | N | 838     |
| 721 | Raloxifene            | N | 5035    |
| 722 | Ramipril              | N | 5362129 |
| 723 | Ranitidine            | N | 5039    |
| 724 | Rebamipide            | N | 5042    |
| 725 | Resorcinol            | N | 5054    |
| 726 | Resveratrol           | N | 445154  |
| 727 | Ribavirin             | N | 5064    |
| 728 | Riboflavin            | N | 710     |
| 729 | Rifabutin             | N | 5361912 |
| 730 | Rifampin              | N | 5381226 |
| 731 | Rifamycin B           | N | 26340   |
| 732 | Rifapentine           | N | 6323497 |
| 733 | Riluzole              | N | 5070    |

---

(Continued)

---

|     |                                |   |         |
|-----|--------------------------------|---|---------|
| 734 | Roflumilast                    | N | 449193  |
| 735 | Rolipram                       | N | 5092    |
| 736 | Ropivacaine                    | N | 71273   |
| 737 | Rotenone                       | N | 5102    |
| 738 | Roxithromycin                  | N | 5106    |
| 739 | Rubitecan                      | N | 65567   |
| 740 | S(-)-Carbidopa                 | N | 34359   |
| 741 | Safrole                        | N | 5144    |
| 742 | Salicylamide                   | N | 5147    |
| 743 | Salinomycin                    | N | 5151    |
| 744 | Salsalate                      | N | 5161    |
| 745 | Santoflex(R) Ip                | N | 7573    |
| 746 | Saquinavir                     | N | 60787   |
| 747 | SCH-351591                     | N | 9802841 |
| 748 | Scopolamine                    | N | 5184    |
| 749 | Secnidazole                    | N | 71815   |
| 750 | Semustine                      | N | 5198    |
| 751 | Sertraline                     | N | 5203    |
| 752 | Sevoflurane                    | N | 5206    |
| 753 | Sibutramine                    | N | 5210    |
| 754 | Simvastatin                    | N | 54454   |
| 755 | Sorbinil                       | N | 5252    |
| 756 | Sorbinil Enantiomer            | N | 5748291 |
| 757 | Sotalol                        | N | 5253    |
| 758 | Sparteine                      | N | 644020  |
| 759 | Spectinomycin                  | N | 2021    |
| 760 | S Piperone                     | N | 5265    |
| 761 | Spirolactone                   | N | 6419955 |
| 762 | Sporidesmin A                  | N | 99596   |
| 763 | Streptozotocin                 | N | 5299    |
| 764 | Strontium Chloride Hexahydrate | N | 159250  |
| 765 | Strychnine                     | N | 441071  |
| 766 | Succimer                       | N | 9354    |
| 767 | Sulbactam                      | N | 5316    |
| 768 | Sulconazole                    | N | 5318    |
| 769 | Sulfadiazine                   | N | 5215    |
| 770 | Sulfadimethoxine               | N | 5323    |
| 771 | Sulfadoxine                    | N | 17134   |
| 772 | Sulfamerazine                  | N | 5325    |
| 773 | Sulfamethazine                 | N | 5327    |
| 774 | Sulfamethizole                 | N | 5328    |
| 775 | Sulfamethoxazole               | N | 5329    |
| 776 | Sulfamonomethoxine             | N | 5332    |
| 777 | Sulfanilamide                  | N | 5333    |
| 778 | Sulfaphenazole                 | N | 5335    |
| 779 | Sulfasalazine                  | N | 5353980 |
| 780 | Sulfathiazole                  | N | 5340    |
| 781 | Sulfapyrazone                  | N | 5342    |
| 782 | Sulfisoxazole                  | N | 5344    |

---

(Continued)

---

|     |                                |   |          |
|-----|--------------------------------|---|----------|
| 783 | Sulindac                       | N | 1548887  |
| 784 | Sulindac Sulfone               | N | 114866   |
| 785 | Sulpiride                      | N | 5355     |
| 786 | Sumatriptan                    | N | 5358     |
| 787 | Suxamethonium Chloride         | N | 5314     |
| 788 | Tacrine                        | N | 1935     |
| 789 | Tamoxifen                      | N | 2733526  |
| 790 | Tazobactam                     | N | 4836     |
| 791 | Tegafur                        | N | 5386     |
| 792 | Telmisartan                    | N | 65999    |
| 793 | Tenidap                        | N | 57946    |
| 794 | Tenofovir Disoproxil           | N | 464205   |
| 795 | Tenoxicam                      | N | 54677971 |
| 796 | Terazosin                      | N | 5401     |
| 797 | Terbinafine                    | N | 5402     |
| 798 | Terbutaline                    | N | 5403     |
| 799 | Terfenadine                    | N | 5405     |
| 800 | Tetracaine                     | N | 5411     |
| 801 | Tetracycline                   | N | 54675776 |
| 802 | Tetrahydrozoline               | N | 5419     |
| 803 | Tetramethylthiuram Monosulfide | N | 7347     |
| 804 | Thalidomide                    | N | 5426     |
| 805 | Theophylline                   | N | 2153     |
| 806 | Thiamine                       | N | 1130     |
| 807 | Thiamphenicol                  | N | 5433     |
| 808 | Thimerosal                     | N | 5908     |
| 809 | Thioacetamide                  | N | 2723949  |
| 810 | Thioctic Acid                  | N | 864      |
| 811 | Thioguanine                    | N | 2723601  |
| 812 | Thioridazine                   | N | 5452     |
| 813 | Thiosalicylic Acid             | N | 5443     |
| 814 | Thiotepa                       | N | 5453     |
| 815 | Thiram                         | N | 5455     |
| 816 | Thymol                         | N | 6989     |
| 817 | Tiapride                       | N | 5467     |
| 818 | Tibolone                       | N | 444008   |
| 819 | Ticlopidine                    | N | 5472     |
| 820 | Ticrynafen                     | N | 38409    |
| 821 | Timolol                        | N | 5478     |
| 822 | Tinidazole                     | N | 5479     |
| 823 | Tiopronin                      | N | 5483     |
| 824 | Tirilazad                      | N | 60516    |
| 825 | Tocainide                      | N | 38945    |
| 826 | Tolazamide                     | N | 5503     |
| 827 | Tolazoline                     | N | 5504     |
| 828 | Tolbutamide                    | N | 5505     |
| 829 | Tolfenamic Acid                | N | 5507     |
| 830 | Tolnaftate                     | N | 5510     |
| 831 | Tolperisone                    | N | 5511     |

---

(Continued)

---

|     |                             |   |         |
|-----|-----------------------------|---|---------|
| 832 | Tolterodine Tartrate        | N | 60774   |
| 833 | Topiramate                  | N | 5514    |
| 834 | Toremifene                  | N | 5516    |
| 835 | Toremide                    | N | 41781   |
| 836 | Tramadol                    | N | 5523    |
| 837 | Tranilast                   | N | 5527    |
| 838 | Tranlycypromine             | N | 5530    |
| 839 | Triacetin                   | N | 5541    |
| 840 | Triamcinolone               | N | 31307   |
| 841 | Triamcinolone Acetonide     | N | 6436    |
| 842 | Trichlormethiazide          | N | 5560    |
| 843 | Trifluoperazine             | N | 5566    |
| 844 | Trihexyphenidyl             | N | 5572    |
| 845 | Trimetazidine               | N | 21109   |
| 846 | Trimethadione               | N | 5576    |
| 847 | Trimipramine                | N | 5584    |
| 848 | Tripeleennamine             | N | 5587    |
| 849 | Tromethamine                | N | 6503    |
| 850 | Tropicamide                 | N | 5593    |
| 851 | Troxipide                   | N | 5597    |
| 852 | U-78517f                    | N | 9808655 |
| 853 | Ubenimex                    | N | 72172   |
| 854 | Urethane                    | N | 5641    |
| 855 | Ursodeoxycholic Acid        | N | 31401   |
| 856 | Valacyclovir                | N | 5647    |
| 857 | Valdecoxib                  | N | 119607  |
| 858 | Valethamate Bromide         | N | 5648    |
| 859 | Valpromide                  | N | 71113   |
| 860 | Valsartan                   | N | 5650    |
| 861 | Vancomycin                  | N | 14969   |
| 862 | Venlafaxine                 | N | 5656    |
| 863 | Verapamil                   | N | 2520    |
| 864 | Vidarabine                  | N | 21704   |
| 865 | Vincristine                 | N | 5978    |
| 866 | Vindesine                   | N | 40839   |
| 867 | Vinorelbine                 | N | 5672    |
| 868 | Vitamin E Succinate         | N | 20353   |
| 869 | VX-745                      | N | 196969  |
| 870 | Xylometazoline              | N | 5709    |
| 871 | Y-27632                     | N | 5711    |
| 872 | Yohimbine                   | N | 2866    |
| 873 | Zaleplon                    | N | 5719    |
| 874 | Zaprinast                   | N | 5722    |
| 875 | Zidovudine                  | N | 5726    |
| 876 | Zileuton                    | N | 60490   |
| 877 | Zinc Dibutyldithiocarbamate | N | 8684    |
| 878 | Zolmitriptan                | N | 5731    |
| 879 | Zolpidem                    | N | 5732    |
| 880 | Zomepirac                   | N | 5733    |
| 881 | Zopiclone                   | N | 5735    |

---

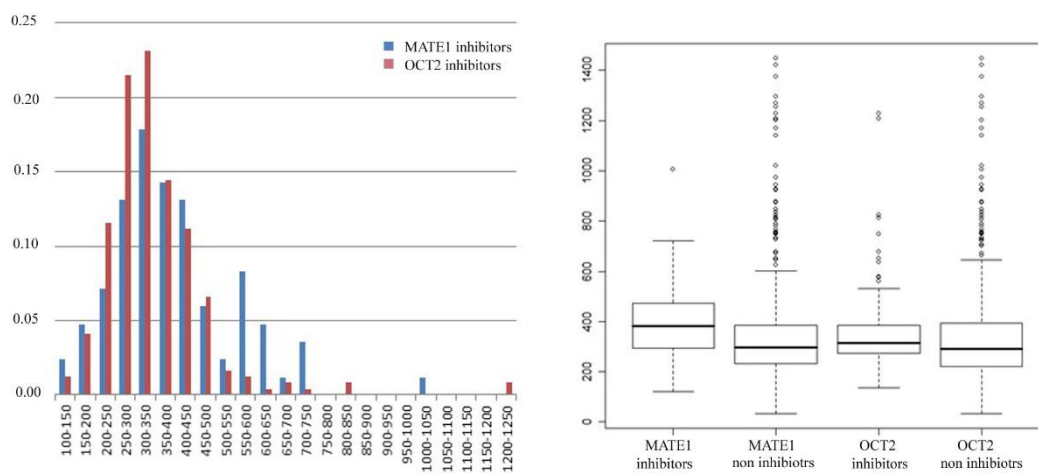

**Supplementary Figure S1.** The molecular weight distribution of MATE1 and OCT2 inhibitors.





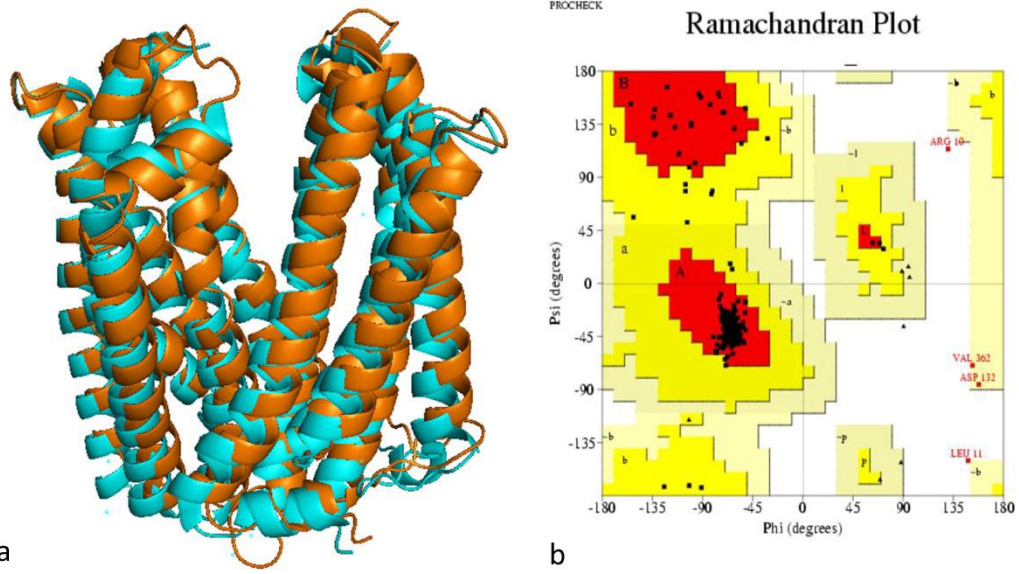

**Supplementary Figure S3.** The homology model of hMATE1. **a.** The structural alignment of homology model and pfMATE, where hMATE1 is in orange color, and the crystal structure of pfMATE in cyan. **b.** Ramachandran plot of homology model, where 95% residuals are in the core region.

## References

- 1 Xu, Y. *et al.* Combinatorial Pharmacophore Modeling of Organic Cation Transporter 2 (OCT2) Inhibitors: Insights into Multiple Inhibitory Mechanisms. *Mol. Pharm.* **10**, 4611-4619 (2013).
